# Supplementary figures and images for: Narrow-Leafed Lupin Main Allergen β-Conglutin (Lup an 1) Detection and Quantification Assessment in Natural and Processed Foods
Source: MDPI journal article supplement (doi:10.3390/foods8100513), 2019-10-18

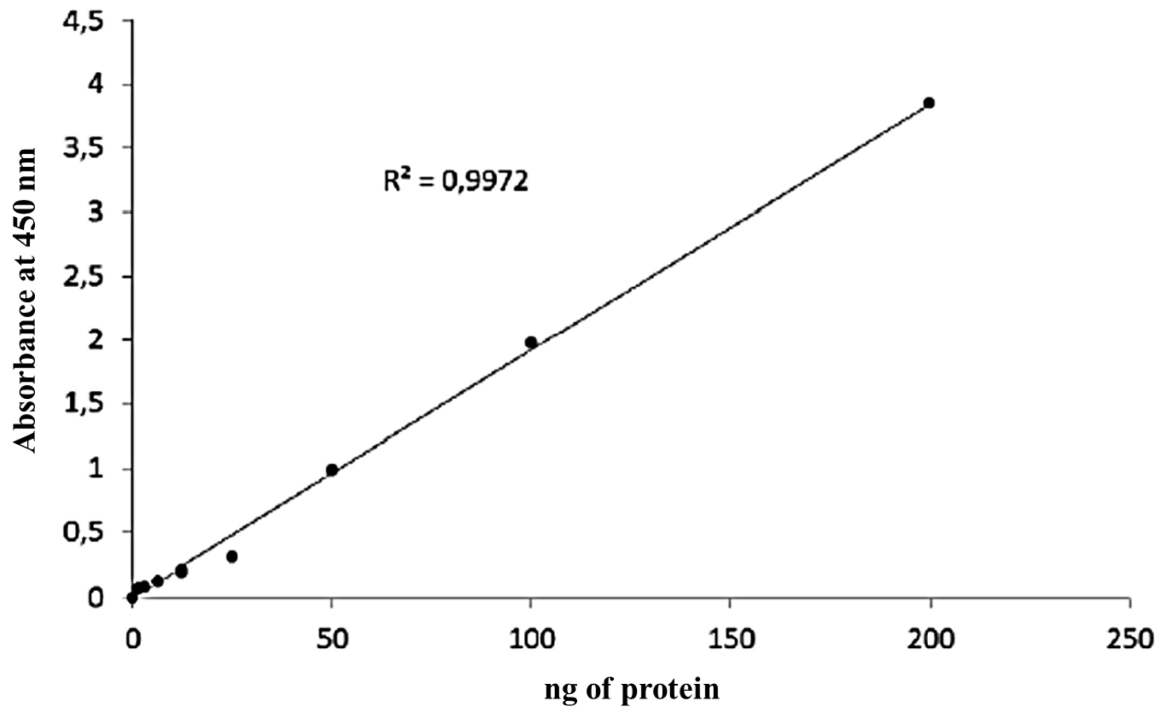

Supplement: s1 [file s1]

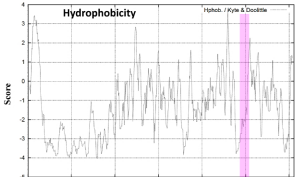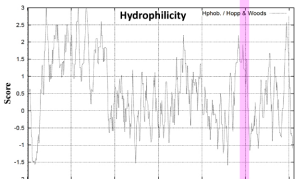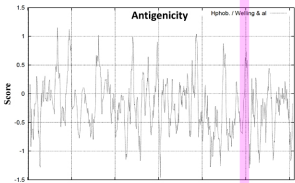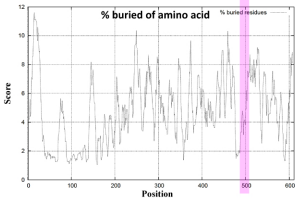

Supplement: s1 [file s1]
